# Supplementary material
Source: Springer Nature journal article supplement (https://www.springermedizin.de/resource/supplementary/13048_2014_280_MOESM5_ESM.pdf/9665274)

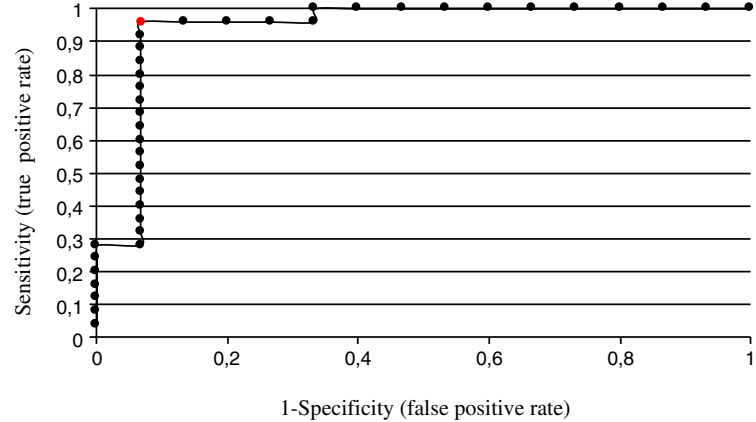

HE4 , AUC=0.941

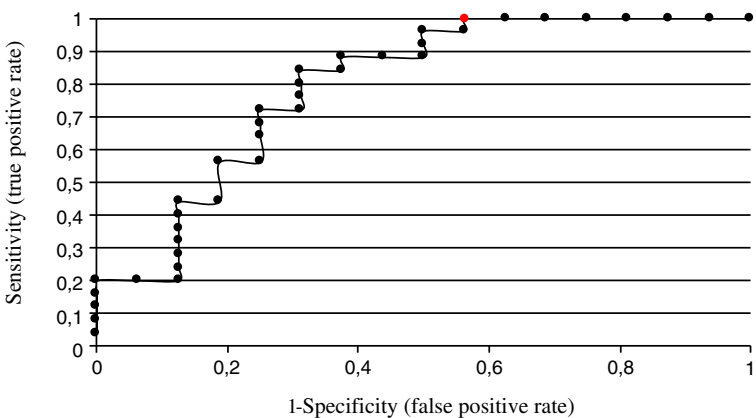

CA 125, AUC=0.793

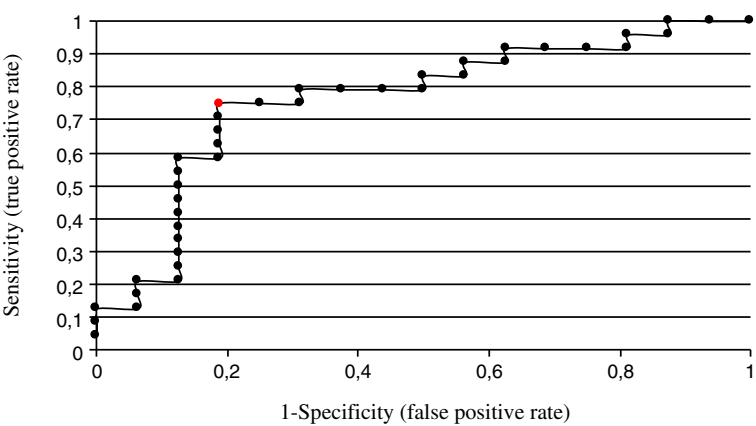

YKL-40, AUC=0.763

Supplement: MOESM5 [file 9665274]
